# Supplementary material
Source: PubMed Central journal article supplement (PMC5568841)
Supplement: NIHMS877173-supplement-Supplement.pdf [file NIHMS877173-supplement-Supplement.pdf]

## Supplementary Online Content

Liu VX, Rosas E, Hwang J, et al. Enhanced recovery after surgery program implementation in 2 surgical populations in an integrated health care delivery system. *JAMA Surg*. Published online May 10, 2017. doi:10.1001/jamasurg.2017.1032

**eTable 1.** Implementation Timeline of ERAS Colorectal (CR) and Hip Fracture (HF) Pathways Across KPNC Facilities Throughout 2014

**eTable 2.** Estimated Deployment Schedule for Key Organizational and Implementation Elements for ERAS Program Implementation in Kaiser Permanente Northern California Designed at the Outset of the Program Design

**eTable 3.** *International Classification of Disease, Ninth Edition, Clinical Modification* Hospital Procedure Codes Used to Identify ERAS Colorectal Target Patients and ERAS Hip Fracture Target Patients

**eTable 4.** AHRQ Clinical Classification Software Categories of Comparator Cohorts for the Enhanced Recovery After Surgery Colorectal Resection and Hip Fracture

**eTable 5.** Proportion of Patients in the ERAS Target and Comparator Surgical Populations with National Surgical Quality Improvement Program (NSQIP) Data Available for Comparison

**eTable 6.** Patient and Hospitalization Characteristics of ERAS Focus Populations and Corresponding Comparator Groups

**eTable 7.** Process Metrics Attainment Before (Pre) and After (Post) Enhanced Recovery After Surgery Implementation Among Colorectal Resection and Hip Fracture Groups With Their Respective Comparators

**eTable 8.** Interrupted Time-Series Analysis of Changes in Process Metrics in ERAS vs Comparator Groups in the Pre- and Post-implementation Phases

**eTable 9.** Difference-in-Difference Risk Ratios for ERAS Patient Process Metrics After Program Implementation Among Colorectal Resection and Hip Fracture Cohorts

**eTable 10.** Outcome Metrics Before (Pre) and After (Post) Enhanced Recovery After Surgery Implementation Among Colorectal Resection and Hip Fracture Groups With Their Respective Comparators

**eFigure.** Number of Monthly Patients in the ERAS Colorectal Resection and Hip Fracture Groups and in the Corresponding Gastrointestinal (GI) and Orthopedic (Ortho) Comparator Groups

This supplementary material has been provided by the authors to give readers additional information about their work.

**eTable 1.** Implementation Timeline of ERAS Colorectal (CR) and Hip Fracture (HF) Pathways Across KPNC Facilities Throughout 2014

| Site | Implementation month in 2014 |     |     |     |     |     |     |     |     |     |     | Number     |              |
|------|------------------------------|-----|-----|-----|-----|-----|-----|-----|-----|-----|-----|------------|--------------|
|      | Feb                          | Mar | Apr | May | Jun | Jul | Aug | Sep | Oct | Nov | Dec | Colorectal | Hip Fracture |
| 1    | CR                           | HIP |     |     |     |     |     |     |     |     |     | 210        | 227          |
| 2    | HIP                          | CR  |     |     |     |     |     |     |     |     |     | 330        | 504          |
| 3    |                              |     | CR  |     |     |     | HIP |     |     |     |     | 134        | 202          |
| 4    |                              |     | CR  |     |     |     |     |     | HIP |     |     | 138        | 229          |
| 5    |                              |     |     | CR  |     |     | HIP |     |     |     |     | 215        | 320          |
| 6    |                              |     |     | CR  |     |     |     |     | HIP |     |     | 240        | 278          |
| 7    |                              |     |     | CR  |     |     |     |     |     | HIP |     | 290        | 327          |
| 8    |                              |     |     | CR  |     |     |     |     |     | HIP |     | 59         | --           |
| 9    |                              |     |     |     |     | HIP |     |     |     | CR  |     | 213        | 339          |
| 10   |                              |     |     |     |     |     | CR  | HIP |     |     |     | 55         | 157          |
| 11   |                              |     |     |     |     |     | CR  | HIP |     |     |     | 169        | 252          |
| 12   |                              |     |     |     |     |     | CR  |     | HIP |     |     | 124        | 125          |
| 13   |                              |     |     |     |     |     | CR  |     | HIP |     |     | 104        | 141          |
| 14   |                              |     |     |     |     |     | HIP |     | CR  |     |     | 96         | 178          |
| 15   |                              |     |     |     |     |     | HIP |     | CR  |     |     | 131        | 286          |
| 16   |                              |     |     |     |     |     | HIP |     |     | CR  |     | 285        | 179          |
| 17   |                              |     |     |     |     |     | CR  |     |     |     | HIP | 157        | 265          |
| 18   |                              |     |     |     |     |     |     | CR  | HIP |     |     | 342        | 451          |
| 19   |                              |     |     |     |     |     |     | HIP | CR  |     |     | 296        | 372          |
| 20   |                              |     |     |     |     |     |     | CR  | HIP |     |     | 180        | 170          |

Numbers in right sided columns indicate the total number patients from each facility across the study period.

**eTable 2.** Estimated Deployment Schedule for Key Organizational and Implementation Elements for ERAS Program Implementation in Kaiser Permanente Northern California Designed at the Outset of the Program Design

| Element                                   | Estimated Timeline |
|-------------------------------------------|--------------------|
| <b>Phase 1</b>                            |                    |
| Steering Committee structure established  | Q3 2013 – Q4 2013  |
| Project goals and metrics defined         | Q2 2013 – Q4 2013  |
| ERAS Pathways developed                   | Q2 2013 – Q4 2013  |
| ERAS Pathways socialized                  | Q3 2013 – Q4 2013  |
| <b>Phase 2</b>                            |                    |
| Alpha Pilot projects initiated            | Q1 2014            |
| Learnings from Alpha Pilots incorporated  | Q1 2014 – Q2 2014  |
| Beta Pilot projects initiated             | Q2 2014            |
| Evaluation for full Regional spread       | Q2 2014            |
| <b>Phase 3</b>                            |                    |
| Learnings consolidated into playbook      | Q2 2014            |
| ERAS Summit                               | End of Q2 2014     |
| Implementation across Northern California | Q3 2014 – Q4 2014  |

Q: quarter

**eTable 3. International Classification of Disease, Ninth Edition, Clinical Modification Hospital Procedure Codes Used to Identify ERAS Colorectal Target Patients and ERAS Hip Fracture Target Patients**

| COLORECTAL Surgery |                                                                   |
|--------------------|-------------------------------------------------------------------|
| Procedure Code     | Description                                                       |
| 17.31              | Laparoscopic multiple segmental resection of large intestine      |
| 17.32              | Laparoscopic cecectomy                                            |
| 17.33              | Laparoscopic right hemicolectomy                                  |
| 17.34              | Laparoscopic resection of transverse colon                        |
| 17.35              | Laparoscopic left hemicolectomy                                   |
| 17.36              | Laparoscopic sigmoidectomy                                        |
| 17.39              | Other laparoscopic partial excision of large intestine            |
| 45.71              | Open and other multiple segmental resection of large intestine    |
| 45.72              | Open and other cecectomy                                          |
| 45.73              | Open and other right hemicolectomy                                |
| 45.74              | Open and other resection of transverse colon                      |
| 45.75              | Open and other left hemicolectomy                                 |
| 45.76              | Open and other sigmoidectomy                                      |
| 45.79              | Other and unspecified partial excision of large intestine         |
| 45.81              | Laparoscopic total intra-abdominal colectomy                      |
| 45.82              | Open total intra-abdominal colectomy                              |
| 45.83              | Other and unspecified total intra-abdominal colectomy             |
| 45.93              | Other small-to-large intestinal anastomosis                       |
| 45.94              | Large-to-large intestinal anastomosis                             |
| 45.95              | Anastomosis to anus                                               |
| 46.03              | Exteriorization of large intestine                                |
| 46.04              | Resection of exteriorized segment of large intestine              |
| 46.1               | Colostomy, not otherwise specified                                |
| 46.11              | Temporary colostomy                                               |
| 46.13              | Permanent colostomy                                               |
| 46.2               | Ileostomy, not otherwise specified                                |
| 46.21              | Temporary ileostomy                                               |
| 46.22              | Continent ileostomy                                               |
| 46.23              | Other permanent ileostomy                                         |
| 48                 | Proctotomy                                                        |
| 48.1               | Proctostomy                                                       |
| 48.4               | Pull-through resection of rectum, not otherwise specified         |
| 48.41              | Soave submucosal resection of rectum                              |
| 48.42              | Laparoscopic pull-through resection of rectum                     |
| 48.43              | Open pull-through resection of rectum                             |
| 48.49              | Other pull-through resection of rectum                            |
| 48.5               | Abdominoperineal resection of the rectum, not otherwise specified |
| 48.51              | Laparoscopic abdominoperineal resection of the rectum             |
| 48.52              | Open abdominoperineal resection of the rectum                     |
| 48.59              | Other abdominoperineal resection of the rectum                    |
| 48.61              | Transsacral rectosigmoidectomy                                    |
| 48.63              | Other anterior resection of rectum                                |
| 48.65              | Duhamel resection of rectum                                       |
| 48.69              | Other resection of rectum                                         |

| HIP FRACTURE Surgery |                                                                        |
|----------------------|------------------------------------------------------------------------|
| Procedure Code       | Description                                                            |
| 78.55                | Internal fixation of bone without fracture reduction, femur            |
| 79.05                | Closed reduction of fracture without internal fixation, femur          |
| 79.15                | Closed reduction of fracture with internal fixation, femur             |
| 79.35                | Open reduction of fracture with internal fixation, femur               |
| 81.51                | Total hip replacement                                                  |
| 81.52                | Partial hip replacement                                                |
|                      |                                                                        |
| With Diagnosis Code  |                                                                        |
| 733.1                | Pathologic fracture, unspecified site                                  |
| 733.1                | Pathologic fracture of neck of femur                                   |
| 734                  | Stress fracture of femoral neck                                        |
| 808.1                | Open fracture of acetabulum                                            |
| 820                  | Closed fracture of intracapsular section of neck of femur, unspecified |
| 820                  | Closed fracture of epiphysis (separation) (upper) of neck of femur     |
| 820                  | Closed fracture of midcervical section of neck of femur                |
| 820                  | Closed fracture of base of neck of femur                               |
| 820.1                | Other closed transcervical fracture of neck of femur                   |
| 820.1                | Open fracture of intracapsular section of neck of femur, unspecified   |
| 820.1                | Open fracture of epiphysis (separation) (upper) of neck of femur       |
| 820.1                | Open fracture of midcervical section of neck of femur                  |
| 820.2                | Other open transcervical fracture of neck of femur                     |
| 820.2                | Closed fracture of trochanteric section of neck of femur               |
| 820.2                | Closed fracture of intertrochanteric section of neck of femur          |
| 820.2                | Closed fracture of subtrochanteric section of neck of femur            |
| 820.3                | Open fracture of trochanteric section of neck of femur, unspecified    |
| 820.3                | Open fracture of intertrochanteric section of neck of femur            |
| 820.3                | Open fracture of subtrochanteric section of neck of femur              |
| 820.8                | Closed fracture of unspecified part of neck of femur                   |
| 820.9                | Open fracture of unspecified part of neck of femur                     |

**eTable 4.** AHRQ Clinical Classification Software Categories of Comparator Cohorts for the Enhanced Recovery After Surgery Colorectal Resection and Hip Fracture

| Colorectal Resection Comparator Procedure List |                  |              | Hip Fracture Comparator Procedure List |                  |            |
|------------------------------------------------|------------------|--------------|----------------------------------------|------------------|------------|
| CCS Category                                   | CCS Level 2 Code | Number (%)   | CCS Category                           | CCS Level 2 Code | Number (%) |
| Gastrectomy                                    | 9.6              | 2,360 (42.5) | Fracture or dislocation                | 14.3             | 832 (54.6) |
| Nephrectomy                                    | 10.3             | 1,070 (19.3) | Lower extremity amputation             | 14.1             | 455 (29.9) |
| Hernia repair                                  | 9.18             | 817 (14.7)   | Arthroplasty                           | 14.7             | 175 (11.5) |
| Other lower GI surgery                         | 9.28             | 542 (9.8)    | Spinal fusion                          | 14.11            | 61 (4.0)   |
| Cholecystectomy                                | 9.16             | 471 (8.5)    |                                        |                  |            |
| Small bowel resection                          | 9.7              | 138 (2.5)    |                                        |                  |            |
| Excision; peritoneal adhesion lysis            | 9.22             | 97 (1.8)     |                                        |                  |            |
| Appendectomy                                   | 9.12             | 61 (1.1)     |                                        |                  |            |

**eTable 5.** Proportion of Patients in the ERAS Target and Comparator Surgical Populations with National Surgical Quality Improvement Program (NSQIP) Data Available for Comparison

|                                    | <b>NSQIP data available</b> |
|------------------------------------|-----------------------------|
| <b>ERAS Colorectal</b>             |                             |
| Pre-implementation                 | 1,015 (53.7)                |
| Post-implementation                | 1,391 (74.1)                |
| <b>Gastrointestinal comparator</b> |                             |
| Pre-implementation                 | 883 (31.5)                  |
| Post-implementation                | 1,073 (39.0)                |
| <b>ERAS Hip Fracture</b>           |                             |
| Pre-implementation                 | 780 (31.4)                  |
| Post-implementation                | 1,507 (59.9)                |
| <b>Orthopedic comparator</b>       |                             |
| Pre-implementation                 | 113 (16.3)                  |
| Post-implementation                | 156 (18.8)                  |

NSQIP data abstraction was regionalized in January 2014 along with a decision to standardize the NSQIP participation model to 'Multispecialty/Targeted' for all medical centers, preferentially targeting colorectal and hip fracture patients.

**eTable 6.** Patient and Hospitalization Characteristics of ERAS Focus Populations and Corresponding Comparator Groups

|                               | Colorectal Resection cohort |                  | Hip Fracture cohort |                    |
|-------------------------------|-----------------------------|------------------|---------------------|--------------------|
|                               | ERAS group                  | Comparator       | ERAS group          | Comparator         |
|                               | <i>n</i> = 3,768            | <i>n</i> = 5,556 | <i>n</i> = 5,002    | <i>n</i> = 1,523   |
| Number pre-implementation     | 1,890 (50.2)                | 2,803 (50.4)     | 2,529 (49.8)        | 692 (45.4)         |
| Age, years                    | 62.7 (14.1)                 | 54.1 (15.1)      | 79.5 (11.8)         | 65.6 (16.8)        |
| Comorbidity (COPS2)           | 27.7 (30.5)                 | 25.3 (29.8)      | 43.7 (40.4)         | 46.3 (47.2)        |
| Severity of illness (LAPS2)   | 20.0 (12.7)                 | 17.6 (6.8)       | 57.5 (29.9)         | 54.6 (31.4)        |
| Direct ICU Admit              | 11 (0.3)                    | 5 (0.1)          | 35 (0.7)            | 41 (2.7)           |
| Admission to surgery, hrs     | 2.2 (1.7 – 2.9)             | 2.0 (1.6 – 2.7)  | 15.8 (6.3 – 23.3)   | 21.0 (14.7 – 31.0) |
| Surgery duration, hrs         | 2.7 (1.9 – 3.8)             | 1.4 (0.9 – 2.7)  | 1.0 (0.7 – 1.4)     | 1.4 (0.8 – 2.1)    |
| Hospital length of stay, days | 4.3 (3.2 – 6.4)             | 2.1 (1.2 – 4.1)  | 3.5 (2.7 – 4.8)     | 3.7 (2.7 – 5.6)    |
| Hospital mortality            | 22 (0.6)                    | 9 (0.2)          | 77 (1.5)            | 15 (1.0)           |
| Discharge to home             | 3,624 (96.2)                | 5,486 (98.7)     | 1,217 (24.0)        | 862 (56.6)         |



**eTable 7.** Process Metrics Attainment Before (Pre) and After (Post) Enhanced Recovery After Surgery Implementation Among Colorectal Resection and Hip Fracture Groups With Their Respective Comparators

|                          | ERAS: Colorectal |                     |                    |         |  | Comparator |                    |                    |         |
|--------------------------|------------------|---------------------|--------------------|---------|--|------------|--------------------|--------------------|---------|
|                          | Number           | Pre                 | Post               | p-value |  | Number     | Pre                | Post               | p-value |
| <b>MOBILITY</b>          |                  |                     |                    |         |  |            |                    |                    |         |
| Early Ambulation         | 3,687            | 415 (22.3)          | 1,032 (56.5)       | <0.001  |  | 5,576      | 1,471 (52.3)       | 1,830 (66.3)       | <0.001  |
| Sustained Ambulation     | 3,685            | 1,603 (86.2)        | 1,735 (95.0)       | <0.001  |  | 5,525      | 2,311 (83.5)       | 2,546 (92.7)       | <0.001  |
| Hrs to first ambulation  | 3,717            | 20.3 (13.5-26.1)    | 10.3 (6.7-18.6)    | <0.001  |  | 5,377      | 9.8 (5.5 – 21.0)   | 7.1 (4.5 – 16.4)   | <0.001  |
| <b>NUTRITION</b>         |                  |                     |                    |         |  |            |                    |                    |         |
| No prolonged fast        | 3,767            | 69 (3.7)            | 247 (13.2)         | <0.001  |  | 5,624      | 153 (5.4)          | 164 (5.9)          | 0.39    |
| Early Nutrition          | 3,767            | 245 (13.0)          | 736 (39.2)         | <0.001  |  | 5,624      | 493 (17.4)         | 592 (21.2)         | <0.001  |
| Hours to first nutrition | 3,680            | 27.0 (18.4-54.1)    | 16.4 (7.0-23.2)    | <0.001  |  | 4,001      | 21.2 (13.3 – 33.9) | 19.8 (8.6 – 27.5)  | <0.001  |
| <b>PAIN and SEDATION</b> |                  |                     |                    |         |  |            |                    |                    |         |
| Benzodiazepine usage     | 3,767            | 267 (14.1)          | 233 (12.4)         | 0.12    |  | 5,624      | 286 (10.1)         | 221 (7.9)          | 0.005   |
| Morphine equivalents, mg | 3,604            | 52.4 (23.0 – 102.0) | 30.6 (13.9 – 65.5) | <0.001  |  | 5,438      | 38.1 (21.0 – 69.0) | 33.3 (18.5 – 59.9) | <0.001  |
| Acceptable Pain score, % | 3,761            | 75.9 (60.0 – 88.7)  | 73.8 (59.3 – 88.4) | 0.14    |  | 5,612      | 67.9 (52.6 – 83.3) | 64.7 (50.0 – 79.2) | <0.001  |

|                          | ERAS: Hip Fracture |                    |                    |         |  | Comparator |                    |                    |         |
|--------------------------|--------------------|--------------------|--------------------|---------|--|------------|--------------------|--------------------|---------|
|                          | Number             | Pre                | Post               | p-value |  | Number     | Pre                | Post               | p-value |
| <b>MOBILITY</b>          |                    |                    |                    |         |  |            |                    |                    |         |
| Early Ambulation         | 4,619              | 66 (2.8)           | 481 (21.2)         | <0.001  |  | 1,403      | 97 (15.1)          | 195 (25.6)         | <0.001  |
| Sustained Ambulation     | 4,616              | 356 (15.2)         | 719 (31.7)         | <0.001  |  | 1,393      | 157 (24.7)         | 307 (40.6)         | <0.001  |
| Hrs to first ambulation  | 3,189              | 25.3 (18.1 – 46.4) | 17.3 (11.6 – 25.5) | <0.001  |  | 1,015      | 20.0 (12.3 – 38.2) | 17.2 (8.4 – 25.3)  | 0.001   |
| <b>NUTRITION</b>         |                    |                    |                    |         |  |            |                    |                    |         |
| No prolonged fast        | 5,002              | 32 (1.3)           | 122 (4.9)          | <0.001  |  | 1,523      | 15 (2.2)           | 28 (3.4)           | 0.16    |
| Early Nutrition          | 5,002              | 1,134 (45.6)       | 1,436 (57.1)       | <0.001  |  | 1,523      | 397 (57.4)         | 526 (63.3)         | 0.02    |
| Hours to first nutrition | 4,915              | 12.6 (6.5 – 17.5)  | 10.3 (4.9 – 15.7)  | <0.001  |  | 1,480      | 8.2 (4.0 – 15.8)   | 7.4 (3.8 – 15.0)   | 0.10    |
| <b>PAIN and SEDATION</b> |                    |                    |                    |         |  |            |                    |                    |         |
| Benzodiazepine usage     | 5,002              | 316 (12.7)         | 251 (10.0)         | 0.002   |  | 1,523      | 86 (12.4)          | 95 (11.4)          | 0.55    |
| Morphine equivalents, mg | 4,887              | 38.9 (22.0 – 66.5) | 27.0 (13.5 – 48.3) | <0.001  |  | 1,402      | 40.8 (21.0 – 78.5) | 39.0 (17.7 – 74.1) | 0.09    |
| Acceptable Pain score, % | 4,988              | 68.2 (54.3 – 82.1) | 72.7 (57.1 – 85.7) | <0.001  |  | 1,523      | 63.0 (47.5 – 77.9) | 63.9 (47.4 – 80.0) | 0.57    |

© 2017 American Medical Association. All rights reserved.

**eTable 8.** Interrupted Time-Series Analysis of Changes in Process Metrics in ERAS vs Comparator Groups in the Pre- and Post-implementation Phases

|                       | Comparison Type                    |                   |                                    |                        |                                    |                   |                                    |
|-----------------------|------------------------------------|-------------------|------------------------------------|------------------------|------------------------------------|-------------------|------------------------------------|
|                       | Baseline Difference                | Pre-period slope  |                                    | Pre to Post Difference |                                    | Post-period slope |                                    |
|                       | <i>ERAS relative to Comparator</i> | <i>Comparator</i> | <i>ERAS relative to Comparator</i> | <i>Comparator</i>      | <i>ERAS relative to Comparator</i> | <i>Comparator</i> | <i>ERAS relative to Comparator</i> |
| <b>Colorectal</b>     |                                    |                   |                                    |                        |                                    |                   |                                    |
| Early Ambulation      | 0.43                               | 1.02              | 1.00                               | 1.06                   | 1.97                               | 0.99              | 1.00                               |
| Sustained ambulation  | 0.98                               | 1.02              | 0.99                               | 0.96                   | 1.07                               | 0.99              | 1.00                               |
| Hours to ambulation   | 1.62                               | 0.97              | 1.01                               | 0.98                   | 0.88                               | 1.02              | 0.98                               |
| No prolonged fast     | 1.04                               | 1.00              | 1.01                               | 1.12                   | 1.55                               | 0.99              | 1.01                               |
| Early nutrition       | 1.01                               | 1.01              | 1.05                               | 1.19                   | 1.66                               | 0.98              | 0.97                               |
| Hours to nutrition    | 1.24                               | 1.00              | 0.98                               | 0.90                   | 0.79                               | 1.00              | 0.99                               |
| Benzodiazepine usage  | 1.34                               | 1.01              | 0.99                               | 0.76                   | 1.32                               | 0.99              | 0.99                               |
| Opioid usage          | 1.28                               | 0.99              | 0.99                               | 0.93                   | 0.97                               | 1.01              | 0.99                               |
| Acceptable pain score | 1.10                               | 0.99              | 1.00                               | 1.03                   | 1.00                               | 1.00              | 1.00                               |
| <b>Hip Fracture</b>   |                                    |                   |                                    |                        |                                    |                   |                                    |
| Early Ambulation      | 0.32                               | 1.03              | 1.10                               | 0.93                   | 2.31                               | 1.04              | 0.92                               |
| Sustained ambulation  | 0.78                               | 1.08              | 1.05                               | 0.99                   | 0.95                               | 0.93              | 0.96                               |
| Hours to ambulation   | 1.07                               | 1.01              | 0.97                               | 1.10                   | 0.76                               | 0.96              | 1.05                               |
| No prolonged fast     | 0.78                               | 1.00              | 0.99                               | 0.93                   | 1.58                               | 1.01              | 0.99                               |
| Early nutrition       | 0.79                               | 1.01              | 1.00                               | 0.97                   | 1.15                               | 1.00              | 1.00                               |
| Hours to nutrition    | 1.26                               | 0.98              | 1.00                               | 1.63                   | 0.66                               | 0.97              | 1.03                               |
| Benzodiazepine usage  | 0.87                               | 0.99              | 0.98                               | 1.17                   | 0.88                               | 0.97              | 1.05                               |
| Opioid usage          | 1.06                               | 0.99              | 1.02                               | 0.95                   | 0.76                               | 1.03              | 0.96                               |
| Acceptable pain score | 1.04                               | 1.01              | 1.00                               | 0.97                   | 1.09                               | 0.99              | 1.00                               |

Rate ratio estimates are based on generalized linear models with log-link and either Poisson distribution (binary outcomes) or Gaussian distribution (continuous outcomes). Ratios are indicative of: (1) baseline differences between the ERAS and comparator groups ('Baseline Difference'); (2) differences in the slope of change during the pre-period ('Pre-period slope'); (3) differences at the implementation period ('Pre to Post Difference'); and (4) differences in the slope of change during the post-period ('Post-period slope'). Significant p-values are indicated for p<0.05 (light blue) and p≤0.01 (dark blue).

**eTable 9.** Difference-in-Difference Risk Ratios for ERAS Patient Process Metrics After Program Implementation Among Colorectal Resection and Hip Fracture Cohorts

|                               | Difference-in-Difference Estimates |             |         |            |                            |         |  |  |
|-------------------------------|------------------------------------|-------------|---------|------------|----------------------------|---------|--|--|
|                               | Colorectal resection vs comparator |             |         |            | Hip fracture vs comparator |         |  |  |
|                               | Rate Ratio                         | 95% CI      | p-value | Rate Ratio | 95% CI                     | p-value |  |  |
| <b>Process Metrics</b>        |                                    |             |         |            |                            |         |  |  |
| <i>Mobility</i>               |                                    |             |         |            |                            |         |  |  |
| Early Ambulation              | 1.99                               | 1.80 – 2.21 | <0.001  | 4.44       | 3.19 – 6.21                | <0.001  |  |  |
| Sustained Ambulation          | 0.99                               | 0.96 – 1.02 | 0.58    | 1.26       | 1.04 – 1.54                | 0.02    |  |  |
| Hours to first ambulation     | 0.84                               | 0.76 – 0.94 | 0.002   | 0.73       | 0.62 – 0.87                | <0.001  |  |  |
| <i>Nutrition</i>              |                                    |             |         |            |                            |         |  |  |
| No prolonged fast             | 3.30                               | 2.36 – 4.62 | <0.001  | 2.42       | 1.17 – 5.03                | 0.02    |  |  |
| Early Nutrition               | 2.47                               | 2.09 – 2.93 | <0.001  | 1.13       | 1.03 – 1.25                | 0.01    |  |  |
| Hours to first nutrition      | 0.62                               | 0.56 – 0.69 | <0.001  | 0.80       | 0.68 – 0.95                | 0.01    |  |  |
| <i>Analgesia and sedation</i> |                                    |             |         |            |                            |         |  |  |
| Benzodiazepine usage          | 1.11                               | 0.88 – 1.41 | 0.35    | 0.85       | 0.62 – 1.17                | 0.33    |  |  |
| Opiate equivalent, mg         | 0.79                               | 0.71 – 0.89 | <0.001  | 0.73       | 0.63 – 0.85                | <0.001  |  |  |
| Acceptable Pain score, %      | 1.03                               | 1.00 – 1.05 | 0.02    | 1.04       | 1.01 – 1.08                | 0.02    |  |  |

**eTable 10.** Outcome Metrics Before (Pre) and After (Post) Enhanced Recovery After Surgery Implementation Among Colorectal Resection and Hip Fracture Groups With Their Respective Comparators

|                             | ERAS: Colorectal |                 |         | Comparator      |                 |         |
|-----------------------------|------------------|-----------------|---------|-----------------|-----------------|---------|
|                             | Pre              | Post            | p-value | Pre             | Post            | p-value |
| Hospital length of stay, d  | 5.1 (3.4 – 7.1)  | 4.2 (3.1 – 6.2) | <0.001  | 2.2 (1.3 – 4.2) | 2.0 (1.2 – 3.6) | <0.001  |
| Hospital mortality          | 16 (0.9)         | 6 (0.3)         | 0.03    | 3 (0.1)         | 7 (0.3)         | 0.20    |
| Discharge to home           | 1,808 (95.7)     | 1,816 (96.7)    | 0.10    | 2,797 (98.6)    | 2,752 (98.7)    | 0.61    |
| 30-day readmission          | 348 (18.6)       | 364 (19.4)      | 0.50    | 238 (8.4)       | 251 (9.0)       | 0.40    |
| Postoperative complications | 184 (18.1)       | 204 (14.7)      | 0.02    | 62 (6.9)        | 85 (7.7)        | 0.46    |
| Major complications         | 42 (4.1)         | 39 (2.8)        | 0.07    | 9 (1.0)         | 25 (2.3)        | 0.03    |

|                             | ERAS: Hip Fracture |                 |         | Comparator      |                 |         |
|-----------------------------|--------------------|-----------------|---------|-----------------|-----------------|---------|
|                             | Pre                | Post            | p-value | Pre             | Post            | p-value |
| Hospital length of stay, d  | 3.6 (2.8 – 4.8)    | 3.2 (2.6 – 4.7) | <0.001  | 3.8 (2.7 – 5.6) | 3.7 (2.7 – 5.7) | 0.70    |
| Hospital mortality          | 35 (1.4)           | 42 (1.7)        | 0.45    | 7 (1.0)         | 8 (1.0)         | 0.92    |
| Discharge to home           | 541 (21.7)         | 676 (26.9)      | <0.001  | 392 (56.7)      | 470 (56.6)      | 0.97    |
| 30-day readmission          | 299 (12.2)         | 342 (13.8)      | 0.09    | 102 (14.9)      | 143 (17.4)      | 0.19    |
| Postoperative complications | 240 (30.8)         | 375 (24.9)      | 0.003   | 29 (25.7)       | 44 (28.2)       | 0.64    |
| Major complications         | 25 (3.2)           | 56 (3.7)        | 0.53    | 4 (3.5)         | 11 (7.1)        | 0.22    |

**eFigure.** Number of Monthly Patients in the ERAS Colorectal Resection and Hip Fracture Groups and in the Corresponding Gastrointestinal (GI) and Orthopedic (Ortho) Comparator Groups

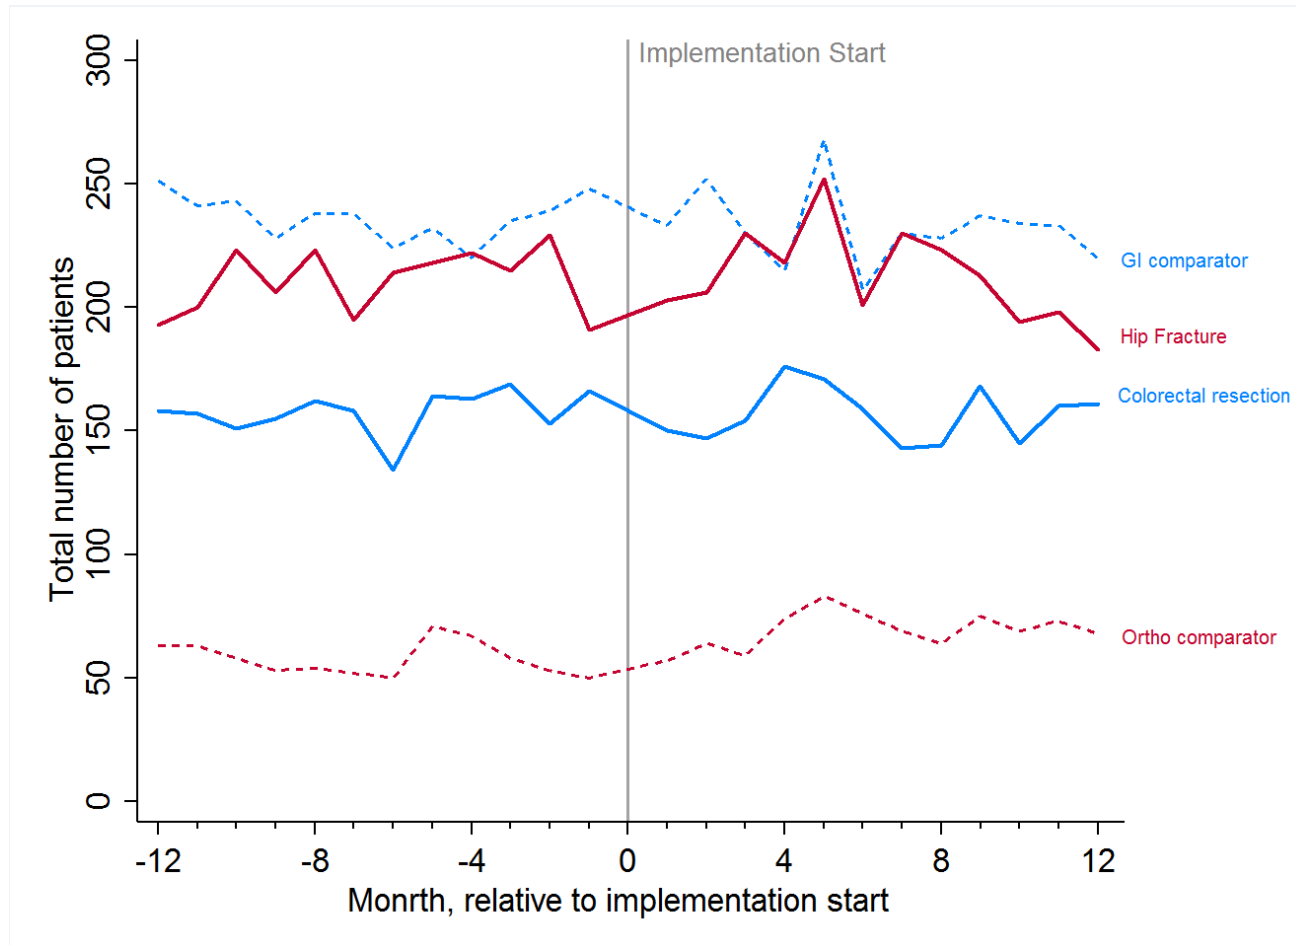

© 2017 American Medical Association. All rights reserved.
